# Supplementary material for: Ruthenium-catalyzed C–H activation of thioxanthones
Source: publisher site journal article supplement (doi:10.3762/bjoc.11.49), 2015-04-02

# Supporting Information

for

## Ruthenium-catalyzed C–H activation of thioxanthenes

Danny Wagner<sup>1</sup> and Stefan Bräse<sup>1,2\*</sup>

Address: <sup>1</sup>Department of Chemistry, Karlsruhe Institute of Technology, Fritz-Haber-Weg 6, 76131 Karlsruhe, Germany and <sup>2</sup>Institute of Toxicology and Genetics, Karlsruhe Institute of Technology, Campus North, Hermann-von-Helmholtz-Platz 1, 76344 Eggenstein-Leopoldshafen, Germany

Email: Stefan Bräse - [braese@kit.edu](mailto:braese@kit.edu)

\*Corresponding author

### Characterization data and spectra for compounds 2 and 3.

#### Table of contents:

|   |                             |    |
|---|-----------------------------|----|
| 1 | Materials and methods ..... | S2 |
| 2 | Analytical data .....       | S2 |

## 1 Materials and methods

$^1\text{H}$  NMR spectra were recorded on a BRUKER Avance 400 (400 MHz) device at room temperature. Chemical shifts are expressed in parts per million (ppm,  $\delta$ ), downfield from tetramethylsilane (TMS) and referenced to residual solvent resonance (chloroform, 7.26 ppm) as internal standard. All coupling constants are absolute values and  $J$  values are expressed in Hertz (Hz). The spectra were analyzed according to first order and the descriptions of signals include: s = singlet, d = doublet, dd = doublet of doublets, t = triplet, q = quartet, m = multiplet.  $^{13}\text{C}$  NMR spectra were recorded on a BRUKER Avance 400 (100 MHz) device at room temperature. Chemical shifts are expressed in parts per million (ppm,  $\delta$ ), downfield from tetramethylsilane (TMS) and referenced to residual solvent resonance ( $\text{CDCl}_3$ , 77.0 ppm) as internal standard. The signal structure was analyzed by DEPT and is described as follows: + = primary or tertiary C-atom (positive DEPT signal), - = secondary C-atom (negative DEPT signal), and  $\text{C}_q$  = quaternary C-atom (no DEPT signal).

**EIMS** (electron ionization mass spectrometry) was performed using a *Finnigan* MAT 95 (70 eV). The molecular fragments are quoted as relation between mass and charge ( $m/z$ ), the intensities as percentage values relative to the intensity of the base signal (100%). The abbreviation  $[\text{M}]^+$  refers to the molecular ion.

**IR** (infrared spectroscopy) data were recorded on a *Bruker* Alpha FTIR spectrometer and are reported as follows: frequency of absorption ( $\text{cm}^{-1}$ ), intensity of absorption (vs = very strong (81–100%), s = strong (61–80%), m = medium (41–60%), w = weak (21–40%), vw = very weak (1–20%)).

Reactions were monitored by silica gel coated aluminium plates (*Merck*, silica gel 60,  $\text{F}_{254}$ ). Detection was performed by examination under UV light (254 nm). Solvents, reagents and chemicals were purchased from *Sigma-Aldrich* and *ABCR*. Toluene was distilled from sodium prior to use. All reactions were executed under argon atmosphere using oven-dried glassware. All other chemicals were used as purchased unless stated otherwise.

## 2 Analytical data

### 8-(3,3-Dimethylbutyl)-1,4-dimethyl-9H-thioxanthen-9-one (Iba)

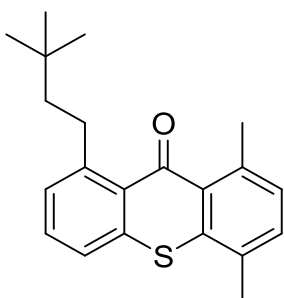

65% yield, clear oil.

$^1\text{H}$  NMR (400 MHz,  $\text{CDCl}_3$ ):  $\delta$  = 1.04 (s, 9 H,  $\text{C}(\text{CH}_3)_3$ ), 1.54 (dt, 2 H,  $\text{CH}_2$ ), 2.47 (s, 3 H,  $\text{CH}_3$  Thiox.), 2.72 (s, 3 H,  $\text{CH}_3$  Thiox.), 3.15 (dt, 2 H,  $\text{CH}_2$ ), 7.15 (d, 1 H,  $H_{\text{ar.}}$ ), 7.23 – 7.28 (m, 2 H,  $H_{\text{ar.}}$ ), 7.37 – 7.44 (m, 2 H,  $H_{\text{ar.}}$ ) –  $^{13}\text{C}$  NMR (100 MHz,  $\text{CDCl}_3$ ):  $\delta$  = 19.5 (+,  $\text{CH}_3$  Thiox.), 21.8 (+,  $\text{CH}_3$  Thiox.), 29.4 (+,  $\text{C}(\text{CH}_3)_3$ ), 29.8 (-,  $\text{CH}_2$ ,  $\text{CH}_2$ ), 30.9 ( $\text{C}_q$ ,  $\text{C}(\text{CH}_3)_3$ ), 46.8 (-,  $\text{CH}_2$ ,  $\text{CH}_2$ ), 123.6 (+, CH, 5- $\text{CH}_{\text{TX}}$ ), 128.9 (+, CH, 7- $\text{CH}_{\text{TX}}$ ), 129.1 (+, CH, 2- $\text{CH}_{\text{TX}}$ ), 130.4 (+, CH, 6- $\text{CH}_{\text{TX}}$ ), 131.1 ( $\text{C}_q$ ,  $\text{C}_{\text{TX}}$ ), 131.3 ( $\text{C}_q$ ,  $\text{C}_{\text{TX}}$ ), 131.5 (+, CH, 3- $\text{CH}_{\text{TX}}$ ), 132.0 ( $\text{C}_q$ ,  $\text{C}_{\text{TX}}$ ), 135.6 ( $\text{C}_q$ ,  $\text{C}_{\text{TX}}$ ), 136.2 ( $\text{C}_q$ ,  $\text{C}_{\text{TX}}$ ), 137.8 ( $\text{C}_q$ ,  $\text{C}_{\text{TX}}$ ), 146.2 ( $\text{C}_q$ ,  $\text{CCH}_2$ ), 187.8 ( $\text{C}_q$ , CO) ppm. – MS (70 eV, EI),  $m/z$  (%): 324 (95)  $[\text{M}^+]$ , 267 (100)  $[\text{C}_{17}\text{H}_{15}\text{OS}^+]$ . – HRMS ( $\text{C}_{21}\text{H}_{24}\text{OS}$ ): calc. 324.1542; found 324.1542 – IR (ATR):  $\tilde{\nu}$  ( $\text{cm}^{-1}$ ) = 2945 (w), 1643 (m) (CO), 1564 (w), 1445 (w), 1390 (vw), 1378 (w), 1363 (w), 1292 (w), 1244 (w), 1207 (w), 1179 (vw), 1150 (vw), 1017 (vw), 953 (vw), 860 (w), 826 (w), 805 (w), 783 (m), 742 (w), 726 (vw), 707 (vw), 686 (w), 617 (vw), 556 (w), 495 (vw), 447 (vw). — EA: calc. for  $\text{C}_{21}\text{H}_{24}\text{OS}$ : C 77.73, H 7.46, S 9.88; found C 78.06, H 7.69, S 9.61.

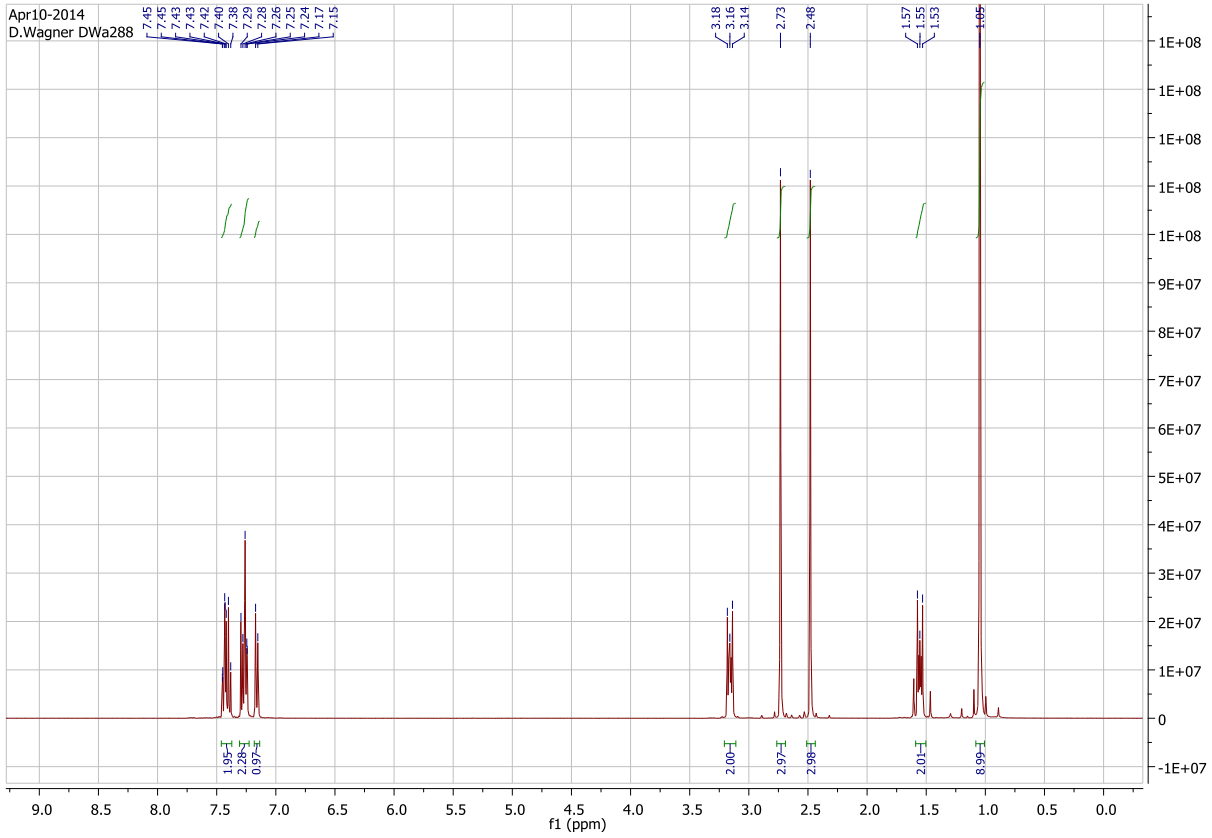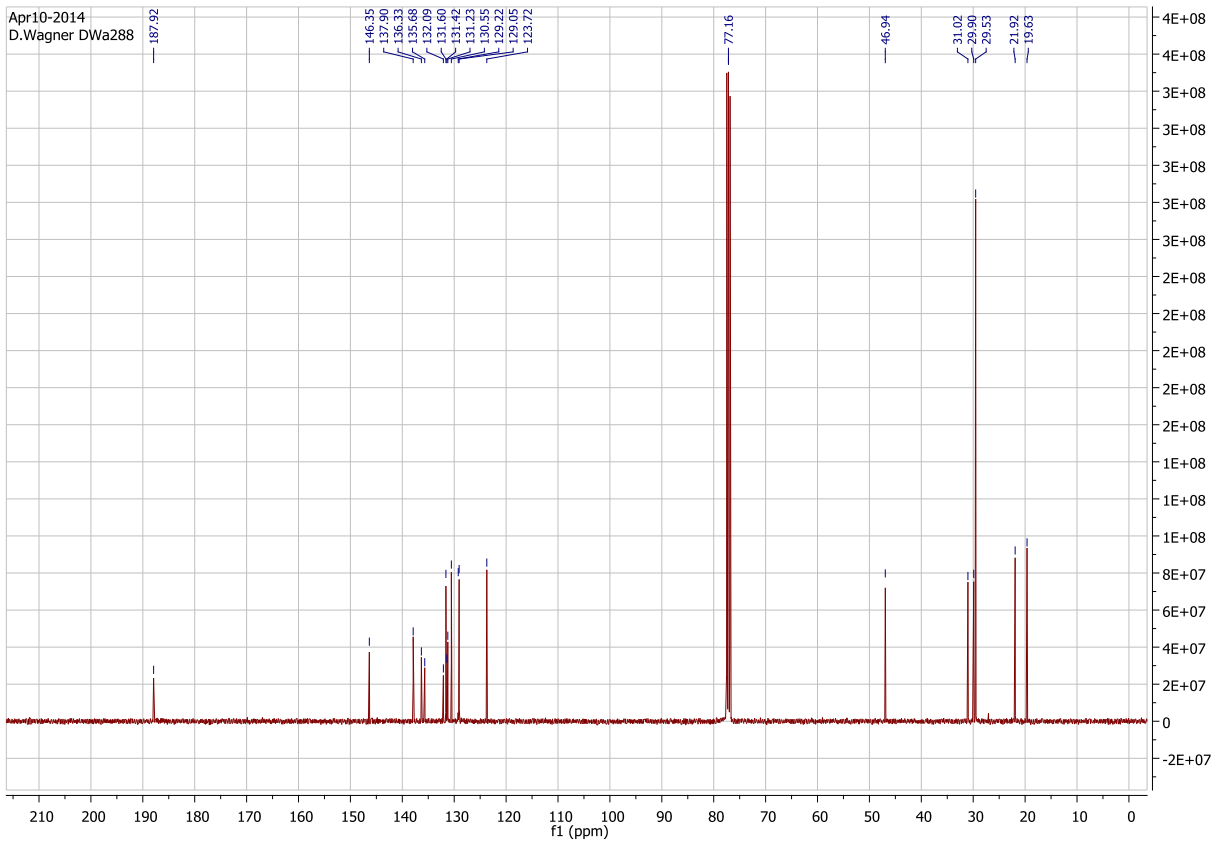

**1,4-Dimethyl-8-(3-phenylpropyl)-9H-thioxanthen-9-one (1bc)**

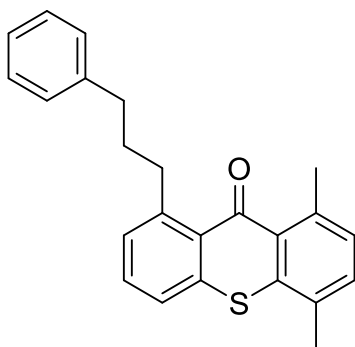

27% yield, clear oil.

$^1\text{H NMR}$  (400 MHz,  $\text{CDCl}_3$ ):  $\delta$  = 2.04 (dq, 2 H,  $\text{CH}_2\text{CH}_2\text{CH}_2$ ), 2.48 (s, 3 H,  $\text{CH}_3$  Thiox.), 2.69 (s, 3 H,  $\text{CH}_3$  Thiox.), 2.77 (t, 2 H,  $\text{CH}_2\text{C}_6\text{H}_5$ ), 3.22 (t, 2 H,  $\text{CH}_2$  Thiox.), 7.15 – 7.25 (m, 5 H,  $H_{\text{ar.}}$ ), 7.28 – 7.47 (m, 5 H,  $H_{\text{ar.}}$ ) –  $^{13}\text{C NMR}$  (100 MHz,  $\text{CDCl}_3$ ):  $\delta$  = 19.62 (+,  $\text{CH}_3$  Thiox.), 22.07 (+,  $\text{CH}_3$  Thiox.), 33.7 (-,  $\text{CH}_2$ ,  $\text{CH}_2\text{CH}_2\text{CH}_2$ ), 34.2 (-,  $\text{CH}_2$ ,  $\text{CH}_2$  Thiox.), 36.1 (-,  $\text{CH}_2$ ,  $\text{CH}_2\text{Ph}$ ), 124.0 (+, CH, 5- $\text{CH}_{\text{TX}}$ ) 125.8 (+, CH, 4'-CH), 128.4 (+, CH, 2'-CH, 6'-CH), 128.6 (+, CH, 3'-CH, 5'-CH), 129.08 (+, CH, 2- $\text{CH}_{\text{TX}}$ ), 129.1 (+, CH, 7- $\text{CH}_{\text{TX}}$ ), 130.5 (+, CH, 3- $\text{CH}_{\text{TX}}$ ), 131.2 ( $\text{C}_q$ ,  $\text{C}_{\text{TX}}$ ), 131.4 ( $\text{C}_q$ ,  $\text{C}_{\text{TX}}$ ), 131.7 (+, CH, 6- $\text{CH}_{\text{TX}}$ ), 132.0 ( $\text{C}_q$ ,  $\text{C}_{\text{TX}}$ ), 135.7 ( $\text{C}_q$ ,  $\text{C}_{\text{TX}}$ ), 136.5 ( $\text{C}_q$ ,  $\text{C}_{\text{TX}}$ ), 138.0 ( $\text{C}_q$ ,  $\text{C}_{\text{TX}}$ ), 142.5 ( $\text{C}_q$ ,  $\text{C}_{\text{TX}}$ ), 145.0 ( $\text{C}_q$ ,  $\text{C}_{\text{Ph}}$ ), 187.9 ( $\text{C}_q$ , CO) ppm. – MS (70 eV, EI),  $m/z$  (%): 358 (85) [ $\text{M}^+$ ], 267 (65) [ $\text{C}_{17}\text{H}_{15}\text{OS}^+$ ], 254 (100) [ $\text{C}_{16}\text{H}_{14}\text{OS}^+$ ]. – HRMS ( $\text{C}_{24}\text{H}_{22}\text{OS}$ ): calcd. 358.1386; found 358.1388 – IR (ATR):  $\tilde{\nu}$  ( $\text{cm}^{-1}$ ) = 2922 (vw), 2852 (vw), 1648 (w) (CO), 1562 (w), 1494 (vw), 1444 (w), 1378 (vw), 1281 (w), 1254 (vw), 1204 (vw), 1177 (vw), 1083 (vw), 1032 (vw), 958 (vw), 905 (vw), 862 (vw), 814 (w), 804 (w), 782 (w), 749 (w), 727 (w), 697 (w), 621 (vw), 587 (vw), 554 (vw), 483 (vw), 445 (vw). — EA: calcd. for  $\text{C}_{24}\text{H}_{22}\text{OS}$ : C 80.41, H 6.19, S 8.94; found C 80.52, H 6.39, S 8.61.

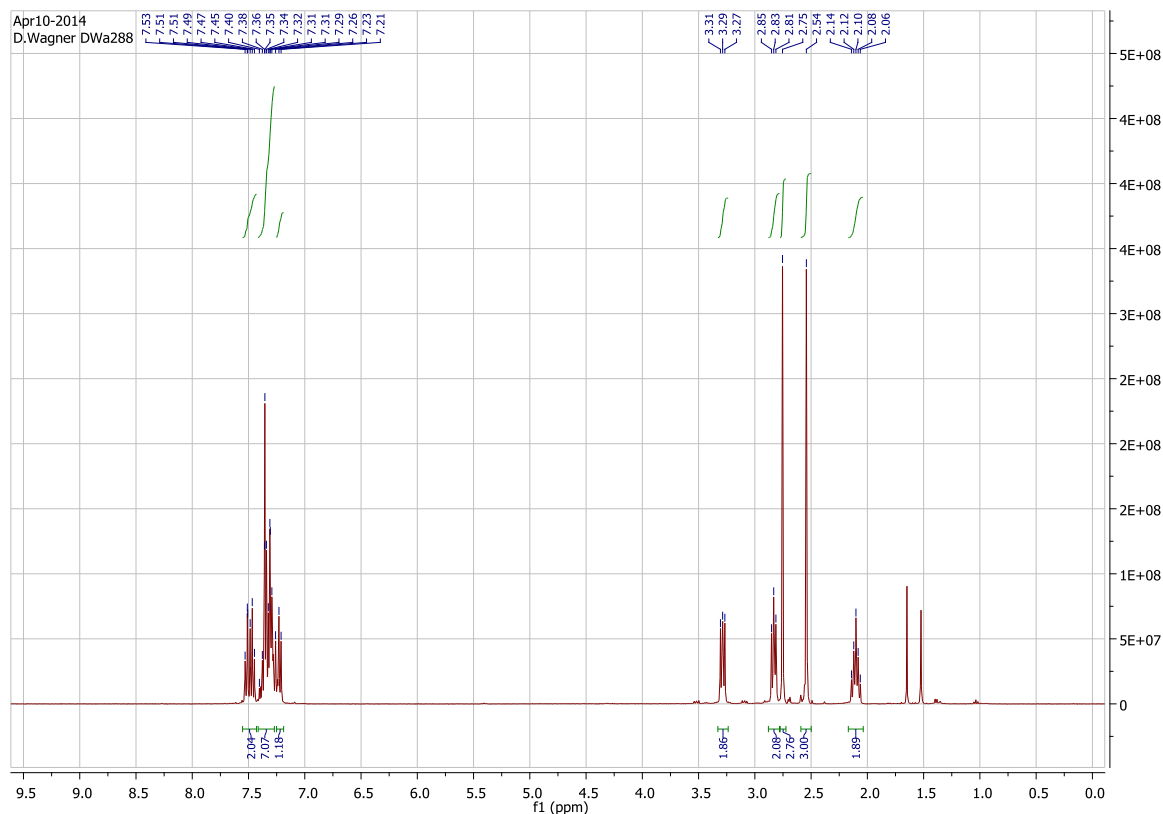

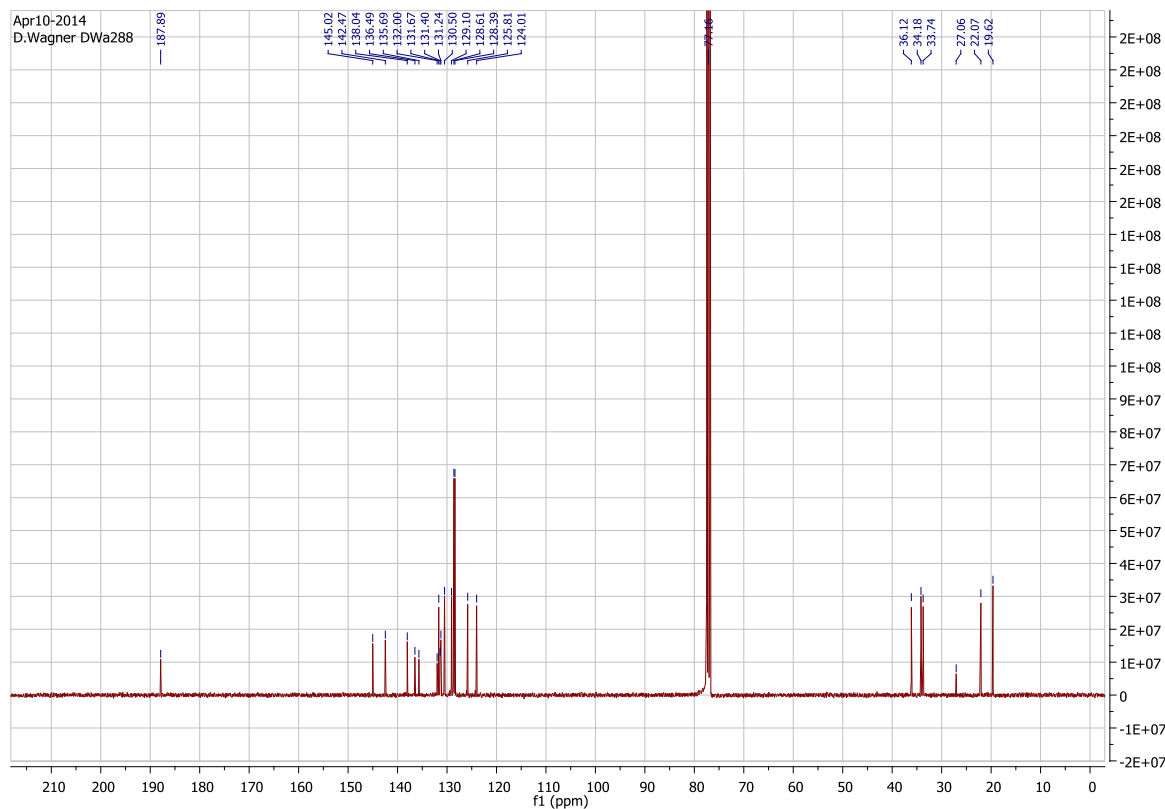

**8-Hexyl-1,4-dimethyl-9H-thioxanthen-9-one (1bb)**

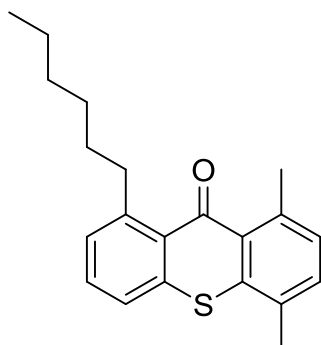

66% yield, clear oil.

$^1\text{H NMR}$  (400 MHz,  $\text{CDCl}_3$ ):  $\delta$  = 0.88 (t, 3 H,  $\text{CH}_2\text{CH}_3$ ), 1.21-1.46 (m, 6 H,  $\text{CH}_2\text{CH}_2\text{CH}_2$ ), 1.64 (m, 2 H,  $\text{CH}_2$ ), 2.45 (s, 3 H,  $\text{CH}_3$  Thiox.), 2.68 (s, 3 H,  $\text{CH}_3$  Thiox.), 3.14 (t, 2 H,  $\text{CH}_2$  Thiox.), 7.13 (d, 1 H,  $H_{\text{ar}}$ ), 7.21 – 7.25 (m, 2 H,  $H_{\text{ar}}$ ), 7.35 – 7.42 (m, 2 H,  $H_{\text{ar}}$ ) –  $^{13}\text{C NMR}$  (100 MHz,  $\text{CDCl}_3$ ):  $\delta$  = 15.3 (+,  $\text{CH}_3$  Hex.), 19.6 (+,  $\text{CH}_3$  Thiox.), 21.9 (+,  $\text{CH}_3$  Thiox.), 22.8 (-,  $\text{CH}_2$ , Hex.), 29.7 (-,  $\text{CH}_2$ , Hex.), 32.0 (-,  $\text{CH}_2$ , Hex.), 32.4 (-,  $\text{CH}_2$ , Hex.), 34.5 (-,  $\text{CH}_2$ , Hex.), 123.8 (+, CH, 5- $\text{CH}_{\text{TX}}$ ), 129.0 (+, CH, 2- $\text{CH}_{\text{TX}}$ ), 129.1 (+, CH, 7- $\text{CH}_{\text{TX}}$ ), 130.5 (+, CH, 3- $\text{CH}_{\text{TX}}$ ), 131.2 ( $\text{C}_{\text{q}}$ ,  $\text{C}_{\text{TX}}$ ), 131.4 ( $\text{C}_{\text{q}}$ ,  $\text{C}_{\text{TX}}$ ), 131.6 (+, CH, 6- $\text{CH}_{\text{TX}}$ ), 132.1 ( $\text{C}_{\text{q}}$ ,  $\text{C}_{\text{TX}}$ ), 135.7 ( $\text{C}_{\text{q}}$ ,  $\text{C}_{\text{TX}}$ ), 136.4 ( $\text{C}_{\text{q}}$ ,  $\text{C}_{\text{TX}}$ ), 137.9 ( $\text{C}_{\text{q}}$ ,  $\text{C}_{\text{TX}}$ ), 145.6 ( $\text{C}_{\text{q}}$ ,  $\text{C}_{\text{TX}}$ ), 188.0 ( $\text{C}_{\text{q}}$ ,  $\text{CO}_{\text{TX}}$ ) ppm. – MS (70 eV, EI),  $m/z$  (%): 324 (90) [ $\text{M}^+$ ], 267 (90) [ $\text{C}_{17}\text{H}_{15}\text{OS}^+$ ], 254 (100) [ $\text{C}_{16}\text{H}_{14}\text{OS}^+$ ]. – HRMS ( $\text{C}_{21}\text{H}_{24}\text{OS}$ ): calcd. 324.1542; found 324.1543 – IR (ATR):  $\tilde{\nu}$  ( $\text{cm}^{-1}$ ) = 3446 (vw), 3054 (vw), 2927 (m), 2856 (m), 1715 (w), 1648 (s) (CO), 1569 (m), 1445 (m), 1380 (w), 1293 (m), 1206 (w), 1173 (vw), 1100 (vw), 1015 (vw), 957 (vw), 860 (w), 817 (w), 804 (w), 782 (w), 728 (vw), 686 (vw), 555 (vw), 439 (vw), 2737 (vw).— EA: calcd.  $\text{C}_{21}\text{H}_{24}\text{OS}$ : C 77.73, H 7.46, S 9.88; found C 77.67, H 7.71, S 9.62.

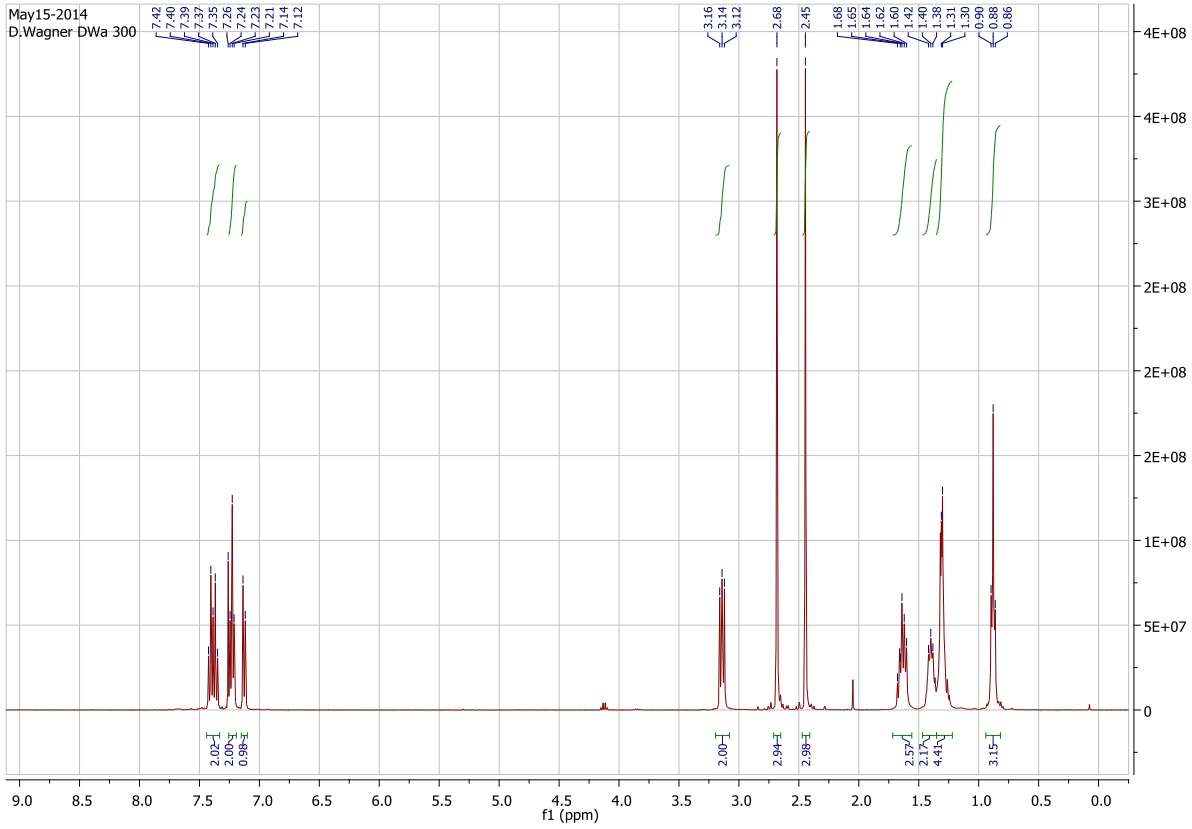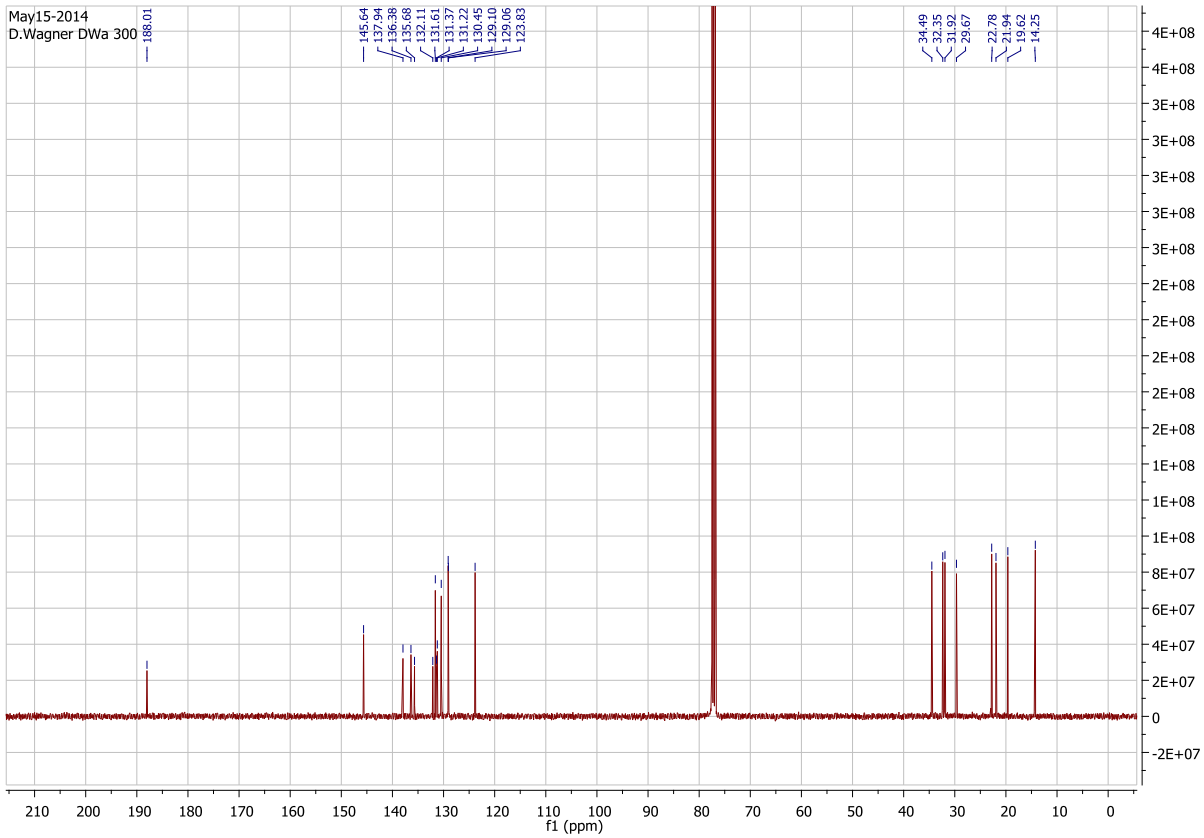

**1,4-Dimethyl-8-(2-(triethoxysilyl)ethyl)-9H-thioxanthen-9-one (1bd)**

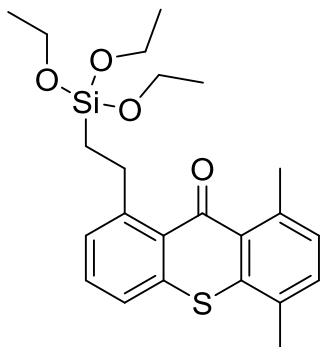

55% yield, clear oil.

$^1\text{H NMR}$  (400 MHz,  $\text{CDCl}_3$ ):  $\delta$  = 1.09 – 1.11 (m, 2 H,  $\text{SiCH}_2$ ), 1.25 (t, 9 H,  $\text{Si}(\text{OCH}_2\text{CH}_3)_3$ ), 2.43 (s, 3 H,  $\text{CH}_3$  Thiox.), 2.67 (s, 3 H,  $\text{CH}_3$  Thiox.), 3.16 – 3.20 (m, 2 H,  $\text{CH}_2$ ), 3.86 – 3.91 (q, 6 H,  $\text{Si}(\text{OCH}_2\text{CH}_3)_3$ ), 7.10 (d, 1 H,  $H_{\text{ar}}$ ), 7.20 – 7.25 (m, 2 H,  $H_{\text{ar}}$ ), 7.35 – 7.41 (m, 2 H,  $H_{\text{ar}}$ ) –  $^{13}\text{C NMR}$  (100 MHz,  $\text{CDCl}_3$ ):  $\delta$  = 13.6 (+,  $\text{CH}_3$  Thiox.), 18.5 (-,  $\text{CH}_2$ ,  $\text{Si}(\text{OCH}_2\text{CH}_3)_3$ ), 19.6 (-,  $\text{CH}_2$ ,  $\text{SiCH}_2$ ), 22.1 (-,  $\text{CH}_2$ ,  $\text{CH}_2$  Thiox.), 28.1 (+,  $\text{CH}_3$  Thiox.), 58.5 (+,  $\text{CH}_3$ ,  $\text{Si}(\text{OCH}_2\text{CH}_3)_3$ ), 123.8 (+, CH, 5- $\text{CH}_{\text{TX}}$ ), 128.6 (+, CH, 7- $\text{CH}_{\text{TX}}$ ), 129.1 (+, CH, 2- $\text{CH}_{\text{TX}}$ ), 130.7 (+, CH, 6- $\text{CH}_{\text{TX}}$ ), 131.1 ( $\text{C}_{\text{q}}$ ,  $\text{C}_{\text{TX}}$ ), 131.2 ( $\text{C}_{\text{q}}$ ,  $\text{C}_{\text{TX}}$ ), 131.6 (+, CH, 3- $\text{CH}_{\text{TX}}$ ), 131.9 ( $\text{C}_{\text{q}}$ ,  $\text{C}_{\text{TX}}$ ), 135.7 ( $\text{C}_{\text{q}}$ ,  $\text{C}_{\text{TX}}$ ), 136.3 ( $\text{C}_{\text{q}}$ ,  $\text{C}_{\text{TX}}$ ), 138.1 ( $\text{C}_{\text{q}}$ ,  $\text{C}_{\text{TX}}$ ), 147.7 ( $\text{C}_{\text{q}}$ ,  $\text{C}_{\text{TX}}$ ), 187.7 ( $\text{C}_{\text{q}}$ , CO) ppm. – MS (70 eV, EI),  $m/z$  (%): 430 (95) [ $\text{M}^+$ ]. – HRMS ( $\text{C}_{23}\text{H}_{30}\text{SiSO}_4$ ): calcd. 430.1632; found 430.1634 – IR (ATR):  $\tilde{\nu}$  ( $\text{cm}^{-1}$ ) = 2970 (m), 2924 (w), 2889 (w), 1635 (m) (CO), 1573 (w), 1445 (m), 1380 (w), 1313 (w), 1298 (w), 1266 (vw), 1205 (vw), 1181 (m), 1071 (vs), 959 (s), 911 (w), 861 (w), 810 (w), 769 (s), 727 (w), 708 (w), 686 (w), 605 (w), 553 (w), 536 (vw), 508 (vw), 449 (w), 420 (w). — EA: calcd.  $\text{C}_{23}\text{H}_{30}\text{O}_4\text{SSi}$ : C 64.15, H 7.02, S 7.45; found C 63.82, H 7.56, S 6.60.

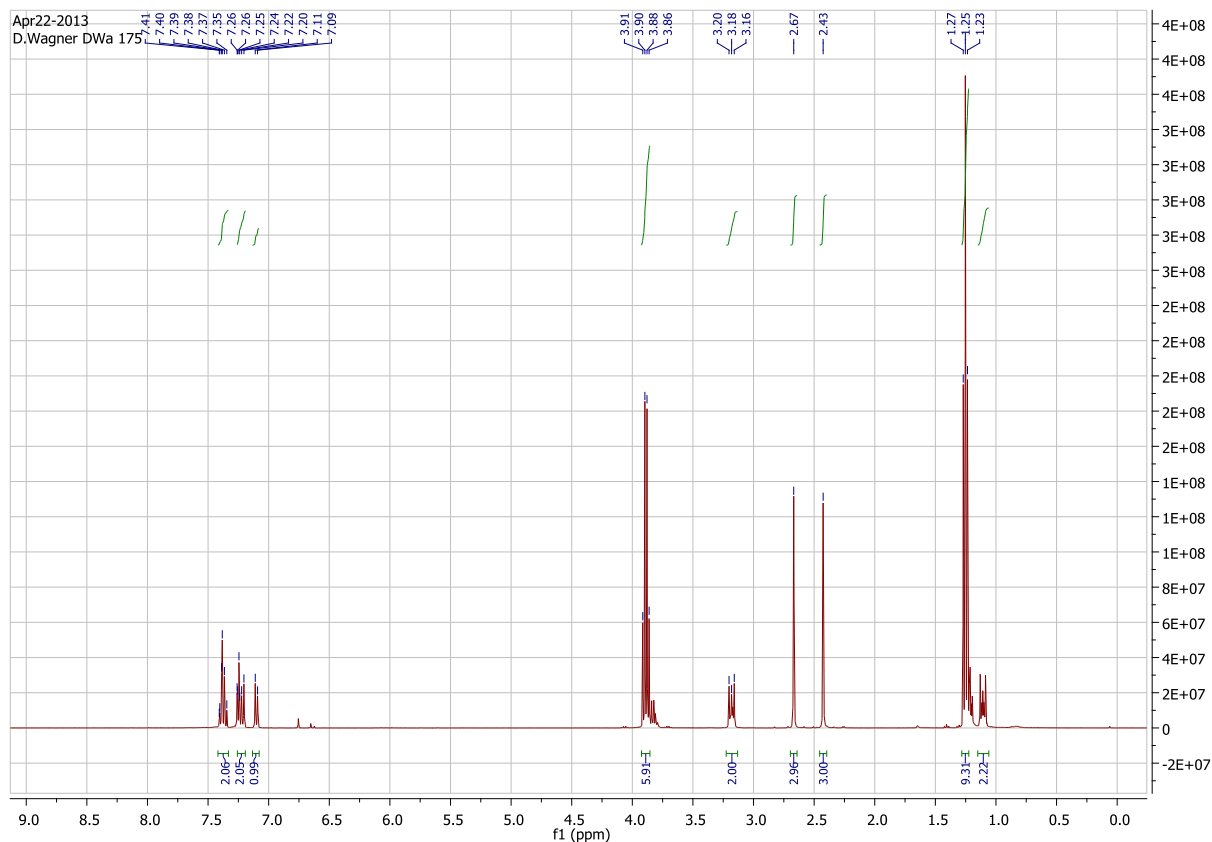

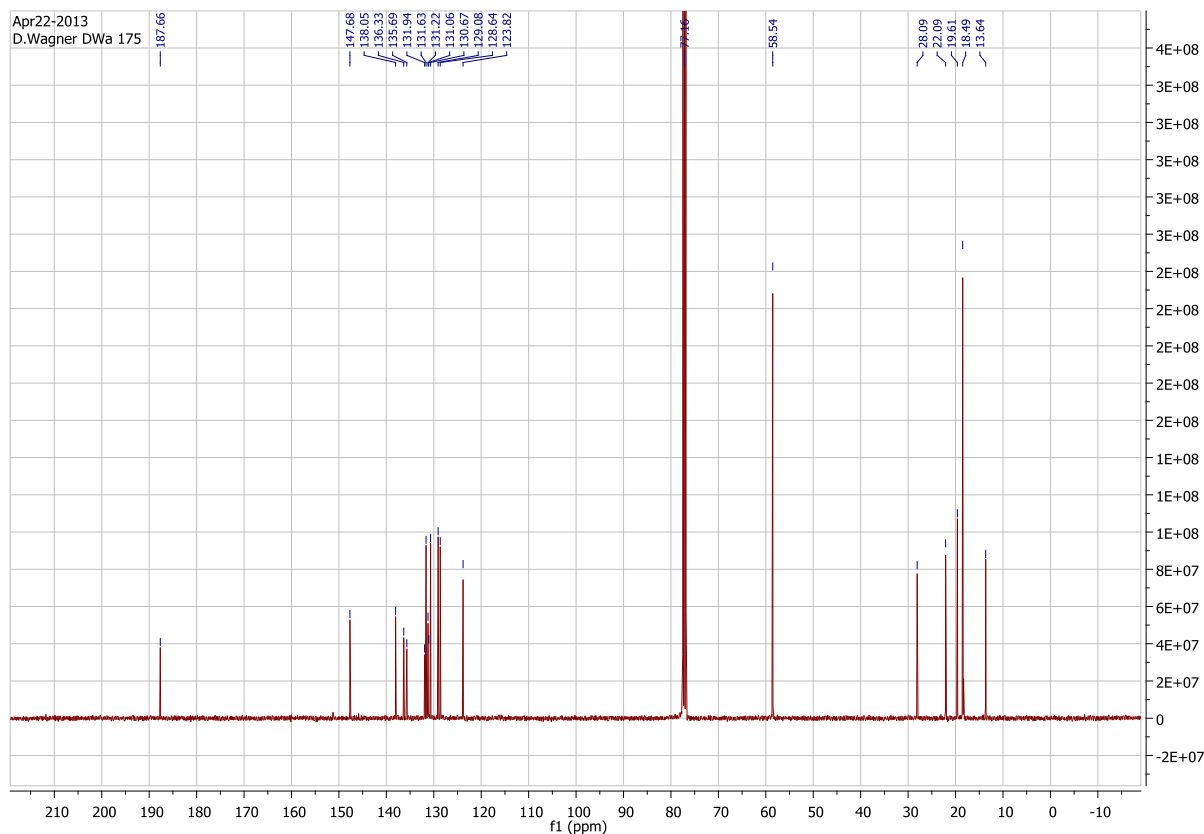

**1-(3-Phenylpropyl)-9H-thioxanthen-9-one (1ac)**

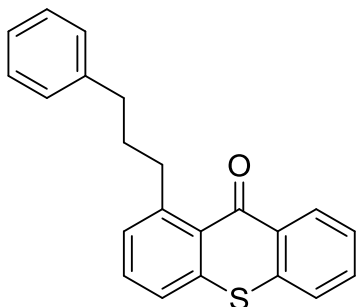

7% yield, clear oil.

$^1\text{H NMR}$  (400 MHz,  $\text{CDCl}_3$ ):  $\delta$  = 2.04 (dq, 2 H,  $\text{CH}_2\text{CH}_2\text{CH}_2$ ), 2.81 (t, 2 H,  $\text{CH}_2\text{C}_6\text{H}_5$ ), 3.34 (t, 2 H,  $\text{CH}_2$  Thiox.), 7.16 – 7.59 (m, 11 H,  $H_{\text{ar.}}$ ), 8.47 (dd, 1 H, 8- $H_{\text{TX}}$ ). –  $^{13}\text{C NMR}$  (100 MHz,  $\text{CDCl}_3$ ):  $\delta$  = 33.4 (-,  $\text{CH}_2$ ,  $\text{CH}_2\text{CH}_2\text{CH}_2$ ), 36.2 (-,  $\text{CH}_2$ ,  $\text{CH}_2\text{TX}$ ), 36.5 (-,  $\text{CH}_2$ ,  $\text{CH}_2\text{Ph}$ ), 124.6 (+, CH, 4'- $\text{CH}_{\text{TX}}$ ), 125.3 (+, CH, 4' CH), 125.8 (+, CH, 7- $\text{CH}_{\text{TX}}$ ), 126.2 (+, CH, 8- $\text{CH}_{\text{TX}}$ ), 128.0 (Cq,  $\text{C}_{\text{TX}}$ ), 128.4 (+, CH, 2'-CH, 6'-CH), 128.6 (+, CH, 3'-CH, 5'-CH), 129.8 (+, CH, 5- $\text{CH}_{\text{TX}}$ ), 129.9 (+, CH, 2- $\text{CH}_{\text{TX}}$ ), 131.3 (+, CH, 6- $\text{CH}_{\text{TX}}$ ), 131.7 (Cq,  $\text{C}_{\text{TX}}$ ), 131.8 (Cq,  $\text{C}_{\text{TX}}$ ), 135.0 (Cq,  $\text{C}_{\text{TX}}$ ), 138.8 (Cq,  $\text{C}_{\text{TX}}$ ), 142.7 (Cq,  $\text{C}_{\text{TX}}$ ), 148.1 (Cq,  $\text{C}_{\text{Ph}}$ ), 182.5 (Cq, CO). MS (70 eV, EI),  $m/z$  (%): 330 (35) [ $\text{M}^+$ ], 239 (100) [ $\text{C}_{15}\text{H}_{11}\text{OS}^+$ ], 226 (95) [ $\text{C}_{14}\text{H}_9\text{OS}^+$ ]. – HRMS ( $\text{C}_{22}\text{H}_{18}\text{OS}$ ): calcd. 330.1073; found 330.1071 – IR (ATR):  $\tilde{\nu}$  ( $\text{cm}^{-1}$ ) = 3023 (vw) 2922 (w), 2849 (w), 1912 (vw), 1626 (m) (CO), 1584 (m), 1493 (w), 1432 (m); 1344 (vw), 1303 (m), 1182 (w), 1154 (w), 1081 (w), 1034 (w), 957 (vw), 928 (vw), 890 (vw), 873 (w), 806 (vw), 784 (w), 740 (m), 714 (m), 696 (m), 670 (m), 647 (w), 581 (vw), 541 (vw), 521 (vw), 484 (w).



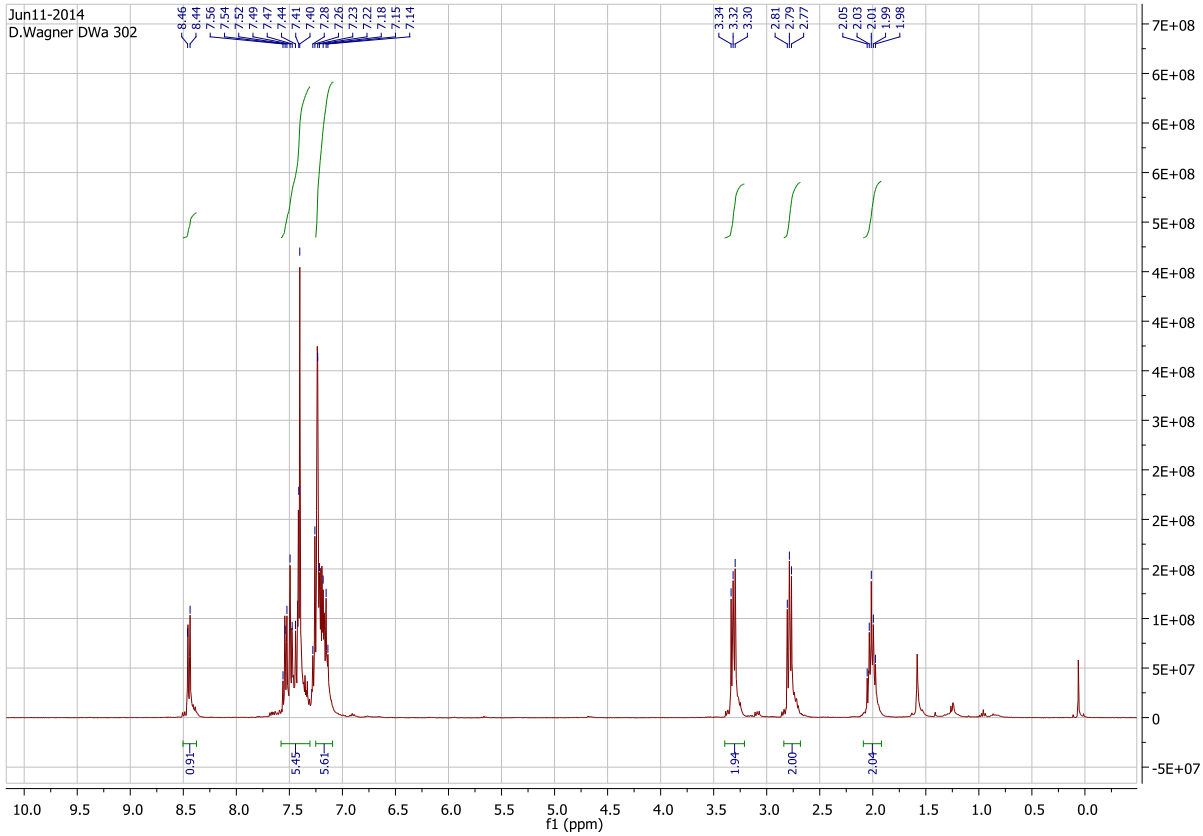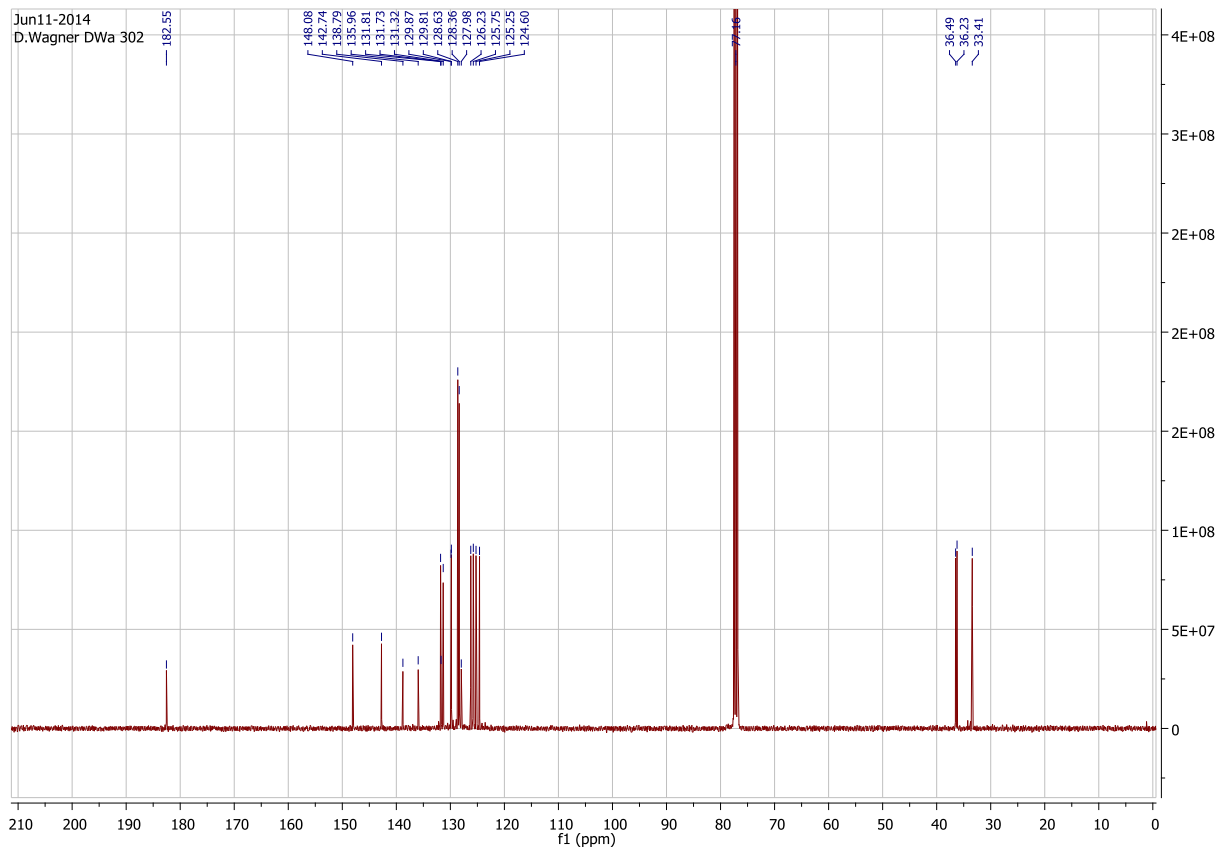

**1-(3,3-Dimethylbutyl)-9H-thioxanthen-9-one (1aa),**

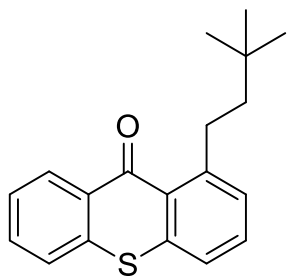

47% yield, clear oil.

$^1\text{H}$  NMR (400 MHz,  $\text{CDCl}_3$ ):  $\delta$  = 1.05 (s, 9 H,  $\text{C}(\text{CH}_3)_3$ ), 1.54 (dt, 2 H,  $\text{CH}_2$ ), 3.26 (dt, 2 H,  $\text{CH}_2$ ), 7.23 – 7.26 (dd, 1 H,  $H_{\text{ar}}$ ), 7.39 – 7.45 (m, 3 H,  $H_{\text{ar}}$ ), 7.48 – 7.57 (m, 2 H,  $H_{\text{ar}}$ ), 8.46 (dd, 1 H,  $H_{\text{ar}}$ ) –  $^{13}\text{C}$  NMR (100 MHz,  $\text{CDCl}_3$ ):  $\delta$  = 29.6 (+,  $\text{CH}_3$ ,  $\text{C}(\text{CH}_3)_3$ ), 31.0 ( $\text{C}_q$ ,  $\text{C}(\text{CH}_3)_3$ ), 32.0 (-,  $\text{CH}_2$ ,  $\text{CH}_{2\text{TX}}$ ), 46.5 (-,  $\text{CH}_2$ ,  $\text{CH}_2$ ), 124.3 (+, CH, 4- $\text{CH}_{\text{TX}}$ ), 125.2 (+, CH, 7- $\text{CH}_{\text{TX}}$ ), 126.1 (+, CH, 8- $\text{CH}_{\text{TX}}$ ), 128.1 ( $\text{C}_q$ ,  $\text{C}_{\text{TX}}$ ), 129.8 (+, CH, 5- $\text{CH}_{\text{TX}}$ ), 129.9 (+, CH, 2- $\text{CH}_{\text{TX}}$ ), 131.4 (+, CH, 6- $\text{CH}_{\text{TX}}$ ), 131.7 (+, CH, 3- $\text{CH}_{\text{TX}}$ ), 131.8 ( $\text{C}_q$ ,  $\text{C}_{\text{TX}}$ ), 135.9 ( $\text{C}_q$ ,  $\text{C}_{\text{TX}}$ ), 138.6 ( $\text{C}_q$ ,  $\text{C}_{\text{TX}}$ ), 149.5 ( $\text{C}_q$ , 1- $\text{C}_{\text{TX}}$ ), 182.5 ( $\text{C}_q$ , CO). MS (70 eV, EI),  $m/z$  (%): 296 (35) [ $\text{M}^+$ ], 239 (100) [ $\text{C}_{15}\text{H}_{11}\text{OS}^+$ ]. – HRMS ( $\text{C}_{19}\text{H}_{20}\text{OS}$ ): calcd. 296.1229; found 296.1228. – IR (ATR):  $\tilde{\nu}$  ( $\text{cm}^{-1}$ ) = 2950 (w), 2859 (w), 1630 (m) (CO), 1583 (m), 1556 (w), 1462 (w), 1443 (m), 1361 (w), 1291 (m), 1235 (w), 1181 (w), 1153 (w), 1126 (w), 1083 (w), 1050 (vw), 1035 (vw), 1009 (vw), 957 (vw), 930 (vw), 872 (w), 811 (vw), 787 (m), 760 (w), 746 (m), 716 (w), 670 (w), 651 (w), 614 (w), 556 (vw). – EA: calcd. for  $\text{C}_{19}\text{H}_{20}\text{OS}$ : C 76.99, H 6.80, S 10.82; found C 77.12, H 7.07, S 10.42

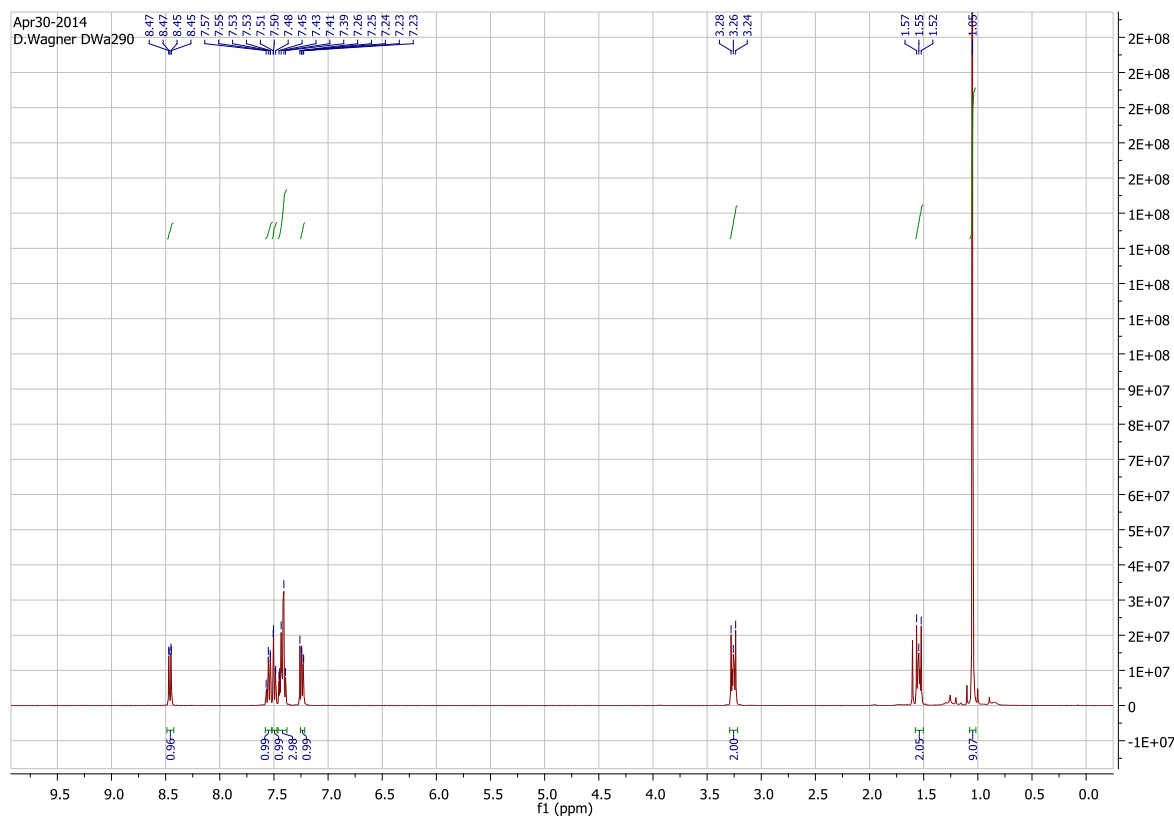

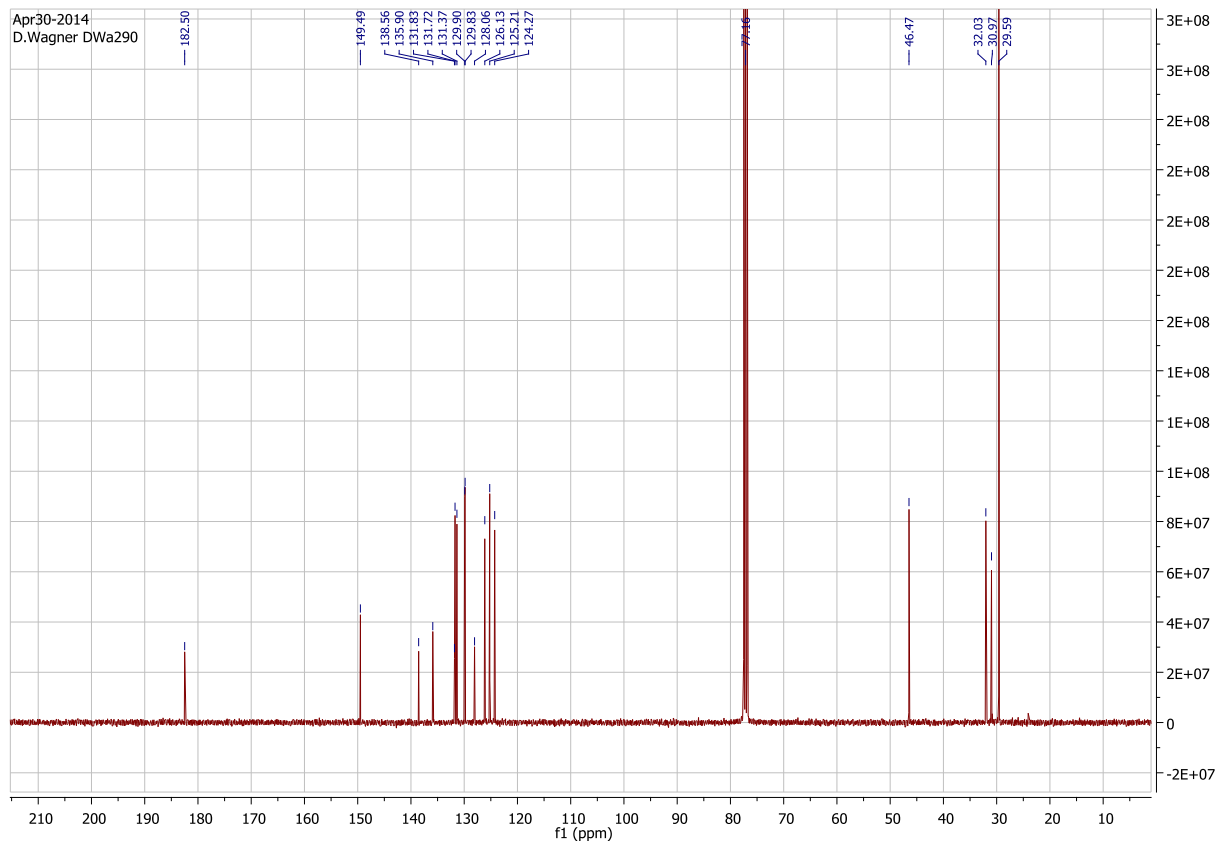

**1,8-Bis(3,3-dimethylbutyl)-9H-thioxanthen-9-one (1aa<sub>bis</sub>)**

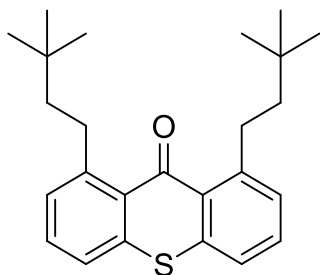

20% yield, clear oil.

$^1\text{H NMR}$  (400 MHz,  $\text{CDCl}_3$ ):  $\delta$  = 1.02 (s, 18 H, 2  $\times$   $\text{C}(\text{CH}_3)_3$ ), 1.63 (dt, 4 H, 2  $\times$   $\text{CH}_2$ ), 3.03 (dt, 4 H, 2  $\times$   $\text{CH}_2$ ), 7.20 – 7.22 (dd, 2 H, 2,6- $H_{\text{TX}}$ ), 7.32 – 7.38 (m, 4 H, 3,4,5,6- $H_{\text{TX}}$ ).  $^{13}\text{C NMR}$  (100 MHz,  $\text{CDCl}_3$ ):  $\delta$  = 29.6 (+,  $\text{CH}_3$ ,  $\text{C}(\text{CH}_3)_3$ ), 30.0 (-,  $\text{CH}_2$ ,  $\text{CH}_{2\text{TX}}$ ), 31.0 ( $\text{C}_q$ ,  $\text{C}(\text{CH}_3)_3$ ), 46.9 (-,  $\text{CH}_2$ ,  $\text{CH}_2$ ), 123.2 (+, CH, 4,5- $\text{CH}_{\text{TX}}$ ), 129.1 (+, CH, 2,7- $\text{CH}_{\text{TX}}$ ), 130.5 (+, CH, 3,6- $\text{CH}_{\text{TX}}$ ), 131.8 ( $\text{C}_q$ ,  $\text{C}_{\text{TX}}$ ), 136.4 ( $\text{C}_q$ ,  $\text{C}_{\text{TX}}$ ), 146.6 ( $\text{C}_q$ ,  $\text{C}_{\text{TX}}$ ), 187.0 ( $\text{C}_q$ , CO). MS (70 eV, EI),  $m/z$  (%): 380 (70) [ $\text{M}^+$ ], 323 (100) [ $\text{C}_{21}\text{H}_{23}\text{OS}^+$ ]. – HRMS ( $\text{C}_{25}\text{H}_{32}\text{OS}$ ): calcd. 380.2168; found 380.2167. – IR (ATR):  $\tilde{\nu}$  ( $\text{cm}^{-1}$ ) = 2943 (vw), 2860 (vw), 1656 (w) (CO), 1577 (vw), 1560 (vw), 1445 (w), 1361 (vw), 1314 (vw), 1284 (w), 1235 (vw), 1181 (vw), 1151 (vw), 1049 (vw), 918 (vw), 863 (vw), 814 (vw), 779 (w), 750 (vw), 686 (vw), 601 (vw), 552 (vw), 450 (vw). EA: calcd. for  $\text{C}_{25}\text{H}_{32}\text{OS}$ : C 78.90, H 8.48, S 8.42; found C 78.91, H 8.68, S 8.12

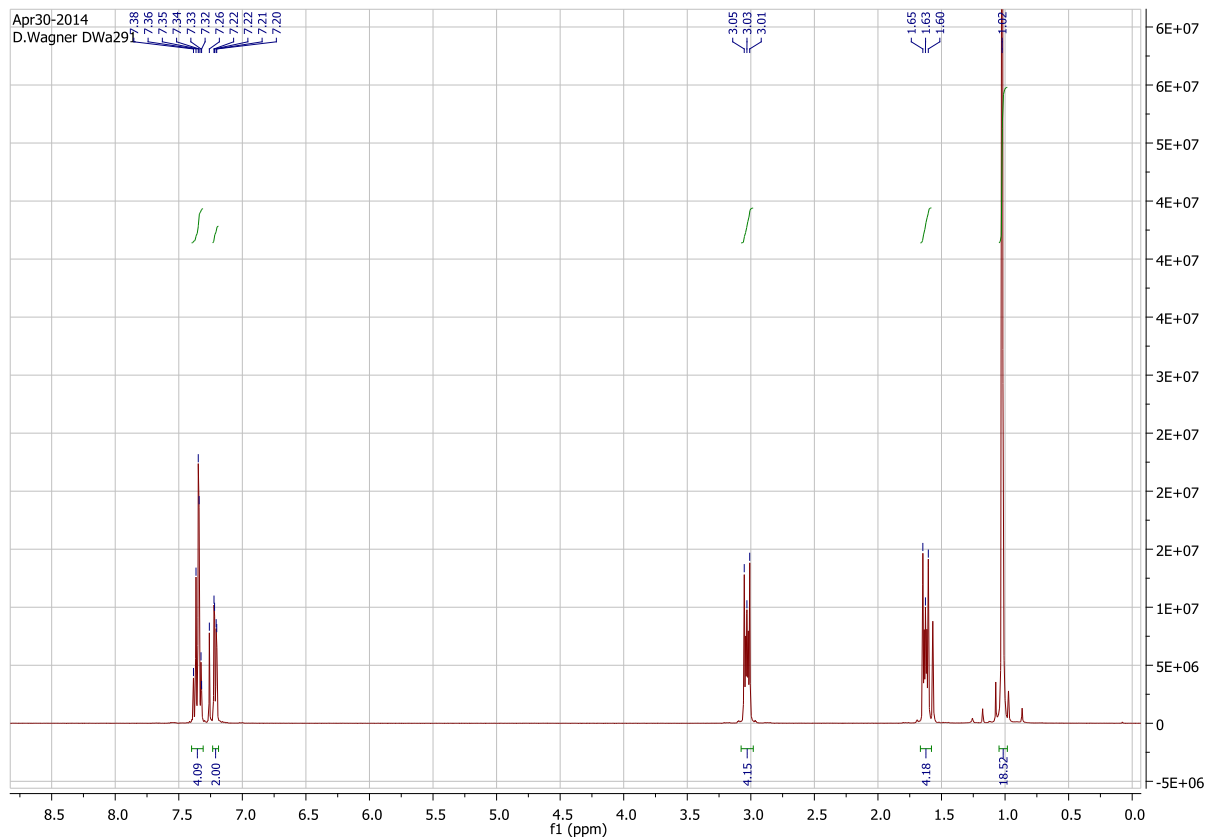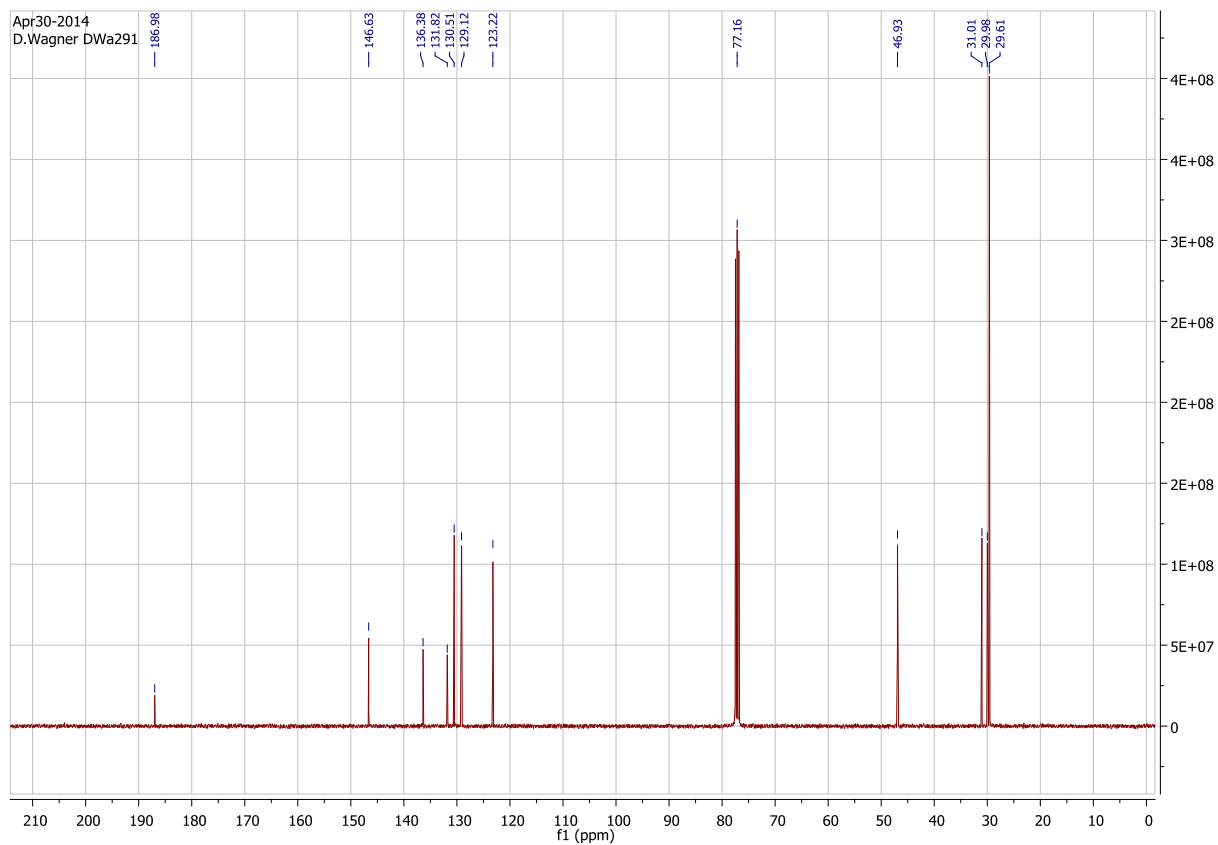

**1,8-Dihexyl-9H-thioxanthen-9-one (1ab<sub>bis</sub>)**

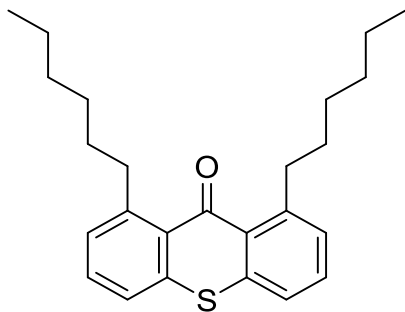

43% yield, clear oil.

$^1\text{H NMR}$  (400 MHz,  $\text{CDCl}_3$ ):  $\delta$  = 0.90 (t, 6 H, 2 x  $\text{CH}_3$ ), 1.33 – 1.43 (m, 12 H, 2 x  $\text{CH}_2\text{CH}_2\text{CH}_2\text{CH}_3$ ), 1.67 (m, 2 H,  $\text{C}_4\text{H}_9\text{CH}_2\text{CH}_2$ ), 3.09 (dt, 2 H,  $\text{C}_5\text{H}_{11}\text{CH}_2$ ), 7.21 – 7.24 (m, 2 H, 2,7- $\text{CH}_{\text{TX}}$ ), 7.33 – 7.36 (m, 4 H, 3,4,5,6- $\text{C}_{\text{TX}}$ ).  $^{13}\text{C NMR}$  (100 MHz,  $\text{CDCl}_3$ ):  $\delta$  = 14.3 (+,  $\text{CH}_3$ ,  $\text{CH}_3$ ), 22.9 (-,  $\text{CH}_2$ ,  $\text{CH}_3\text{CH}_2$ ), 29.8 (-,  $\text{CH}_2$ ,  $\text{C}_2\text{H}_5\text{CH}_2$ ), 31.9 (-,  $\text{CH}_2$ ,  $\text{C}_3\text{H}_7\text{CH}_2$ ), 32.4 (-,  $\text{CH}_2$ ,  $\text{C}_4\text{H}_9\text{CH}_2$ ), 34.4 (-,  $\text{CH}_2$ ,  $\text{C}_5\text{H}_{11}\text{CH}_2$ ), 123.4 (+, CH, 4- $\text{CH}_{\text{TX}}$ ), 128.9 (+, CH, 2-CH), 130.4 (+, CH, 3-CH), 131.8 ( $\text{C}_q$ ,  $\text{C}_{\text{TX}}$ ), 136.5 ( $\text{C}_q$ ,  $\text{C}_{\text{TX}}$ ), 145.7 ( $\text{C}_q$ ,  $\text{C}_{\text{TX}}$ ), 187.5 ( $\text{C}_q$ , CO). – MS (70 eV, EI),  $m/z$  (%): 380 (100) [ $\text{M}^+$ ]. – HRMS ( $\text{C}_{25}\text{H}_{32}\text{OS}$ ): calcd. 380.2168; found 380.2168. – IR (ATR):  $\tilde{\nu}$  ( $\text{cm}^{-1}$ ) = 3444 (vw), 3055 (vw), 2956 (w), 2926 (w), 2855 (w), 1653 (w) (CO), 1581 (w), 1560 (vw), 1445 (w), 1378 (vw), 1288 (vw), 1174 (vw), 1118 (vw), 861 (vw), 779 (w), 722 (vw), 687 (vw), 542 (vw). – EA: calcd. for  $\text{C}_{25}\text{H}_{32}\text{OS}$ : C 78.90, H 8.48, S 8.42; found C 79.40, H 8.09, S 7.67.

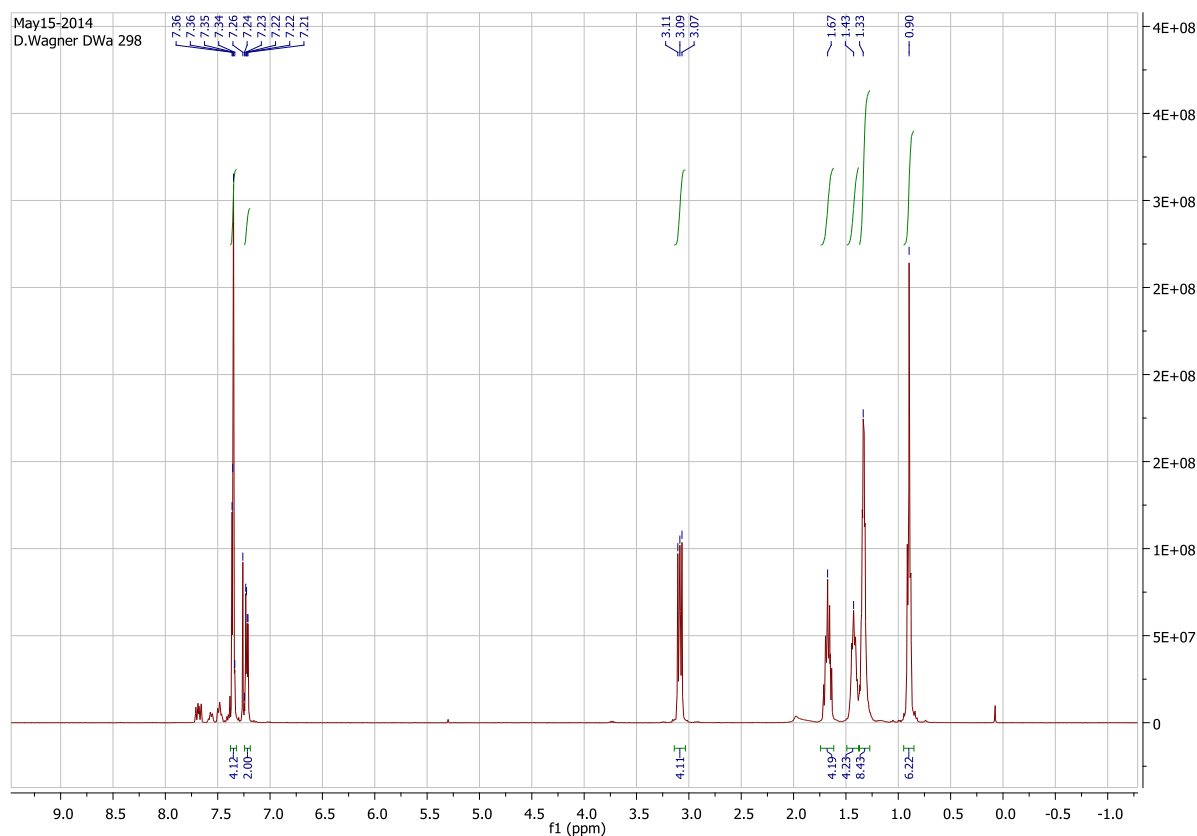

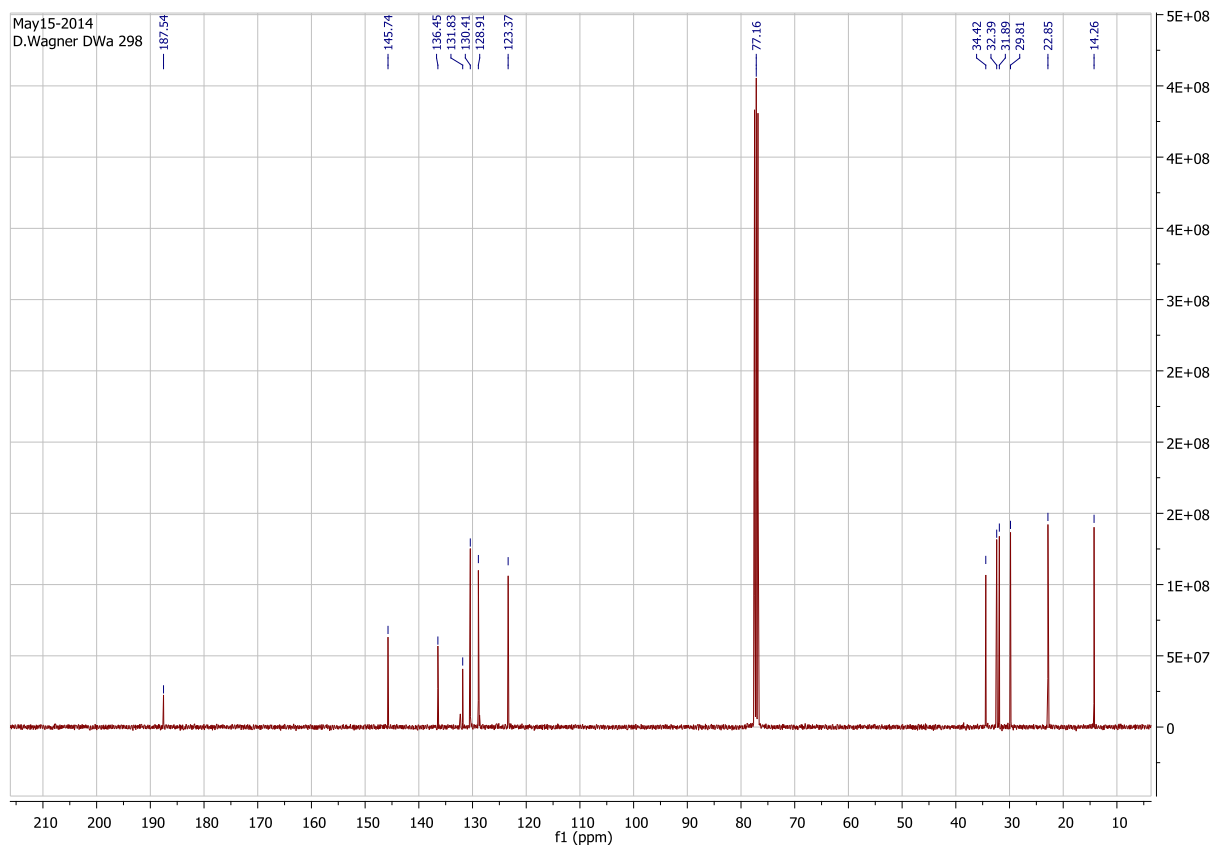

**8-(3,3-Dimethylbutyl)-4-methoxy-1-methyl-9H-thioxanthen-9-one (1ha)**

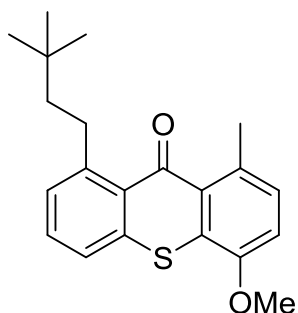

83%, clear oil

$^1\text{H NMR}$  (400 MHz,  $\text{CDCl}_3$ ):  $\delta$  = 1.01 (s, 9 H,  $\text{C}(\text{CH}_3)_3$ ), 1.51 (dt, 2 H,  $\text{CH}_2$ ), 2.67 (s, 3 H,  $\text{CH}_3$ ), 3.13 (dt, 2 H,  $\text{CH}_2$ ), 3.98 (s, 3 H,  $\text{OCH}_3$ ), 6.92 (d, 1 H,  $H_{\text{ar}}$ ), 7.15 – 7.22 (m, 2 H,  $H_{\text{ar}}$ ), 7.34 – 7.42 (m, 2 H,  $H_{\text{ar}}$ ).  $^{13}\text{C NMR}$  (100 MHz,  $\text{CDCl}_3$ ):  $\delta$  = 21.5 (+,  $\text{CH}_3$  Thiox.), 29.4 (+,  $\text{C}(\text{CH}_3)_3$ ), 30.1 (-,  $\text{CH}_2$ ,  $\text{CH}_2$ ), 31.0 ( $\text{C}_{\text{q}}$ ,  $\text{C}(\text{CH}_3)_3$ ), 46.9 (-,  $\text{CH}_2$ ,  $\text{CH}_2$ ), 56.6 (+,  $\text{CH}_3$ ,  $\text{OCH}_3$ ), 111.2 (+, CH, 3- $\text{CH}_{\text{TX}}$ ), 124.1 (+, CH, 5- $\text{CH}_{\text{TX}}$ ), 126.2 ( $\text{C}_{\text{q}}$ ,  $\text{C}_{\text{TX}}$ ), 129.1 (+, CH, 2- $\text{CH}_{\text{TX}}$ ), 129.2 (+, CH, 7- $\text{CH}_{\text{TX}}$ ), 130.6 (+, CH, 6- $\text{CH}_{\text{TX}}$ ), 131.2 ( $\text{C}_{\text{q}}$ ,  $\text{C}_{\text{TX}}$ ), 132.2 ( $\text{C}_{\text{q}}$ ,  $\text{C}_{\text{TX}}$ ), 132.3 ( $\text{C}_{\text{q}}$ ,  $\text{C}_{\text{TX}}$ ), 136.9 ( $\text{C}_{\text{q}}$ ,  $\text{C}_{\text{TX}}$ ), 146.6 ( $\text{C}_{\text{q}}$ ,  $\text{C}_{\text{TX}}$ ), 152.2 ( $\text{C}_{\text{q}}$ ,  $\text{C}_{\text{TX}}$ ), 187.2 ( $\text{C}_{\text{q}}$ , CO). ppm. MS (70 eV, EI),  $m/z$  (%): 283 (100) [ $\text{C}_{17}\text{H}_{15}\text{O}_2\text{S}^+$ ], 340 (50) [ $\text{M}^+$ ]. – HRMS ( $\text{C}_{21}\text{H}_{24}\text{O}_2\text{S}$ ): calcd. 340.1492; found 340.1491. – IR (ATR):  $\tilde{\nu}$  ( $\text{cm}^{-1}$ ) = 2954 (w), 1646 (w), 1560 (w), 1444 (w), 1392 (w), 1363 (vw), 1293 (w), 1259 (w), 1244 (w), 1216 (w), 1183 (w), 1063 (w), 954 (w), 859 (w), 813 (w), 802 (w), 786 (w), 752 (vw), 724 (vw), 689 (w), 634 (vw), 617 (vw), 565 (vw), 547 (vw), 442 (vw). EA: calcd. for  $\text{C}_{21}\text{H}_{24}\text{O}_2\text{S}$ : C 74.08, H 7.11, S 9.42; found C 74.29, H 7.19, S 9.33

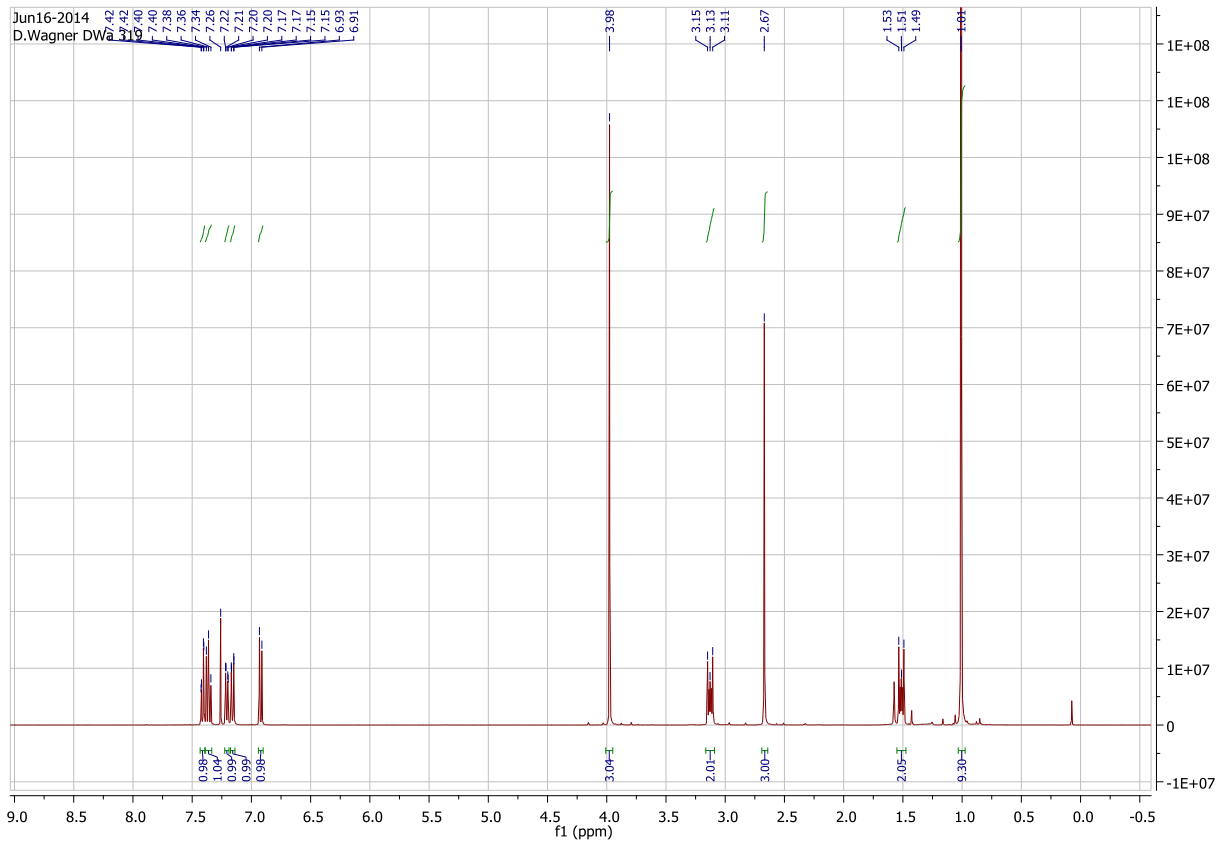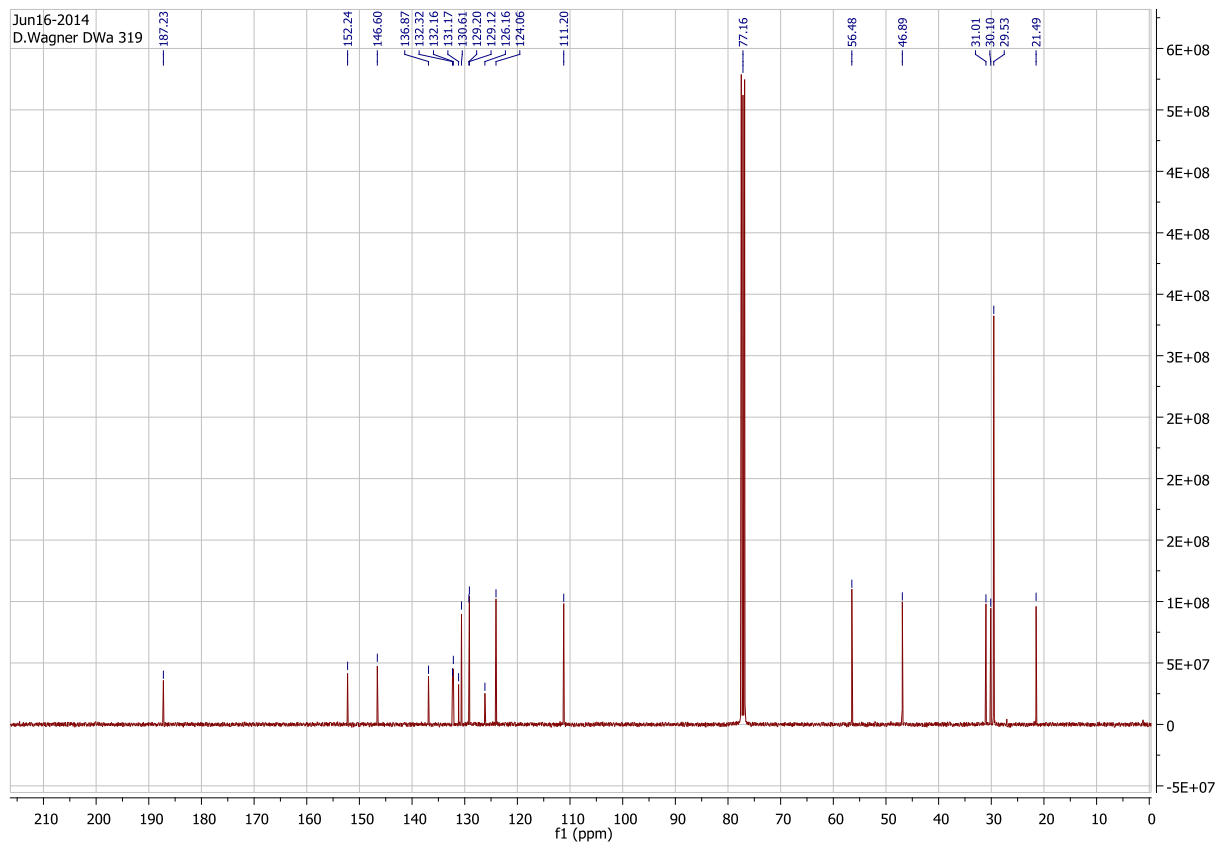

**8-Hexyl-4-methoxy-1-methyl-9H-thioxanthen-9-one (1hb)**

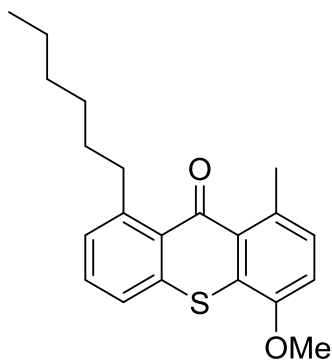

65%, clear oil.

$^1\text{H NMR}$  (400 MHz,  $\text{CDCl}_3$ ):  $\delta$  = 0.88 (t, 3 H,  $\text{CH}_2\text{CH}_3$ ), 1.29-1.40 (m, 6 H,  $\text{CH}_2\text{CH}_2\text{CH}_2$ ), 1.64 (m, 2 H,  $\text{CH}_2$ ), 2.66 (s, 3 H,  $\text{CH}_3$  Thiox.), 3.14 (t, 2 H,  $\text{CH}_2$  Thiox.), 3.98 (s, 3 H,  $\text{OCH}_3$ ), 6.92 (d, 1 H,  $H_{\text{ar.}}$ ), 7.15 – 7.22 (m, 2 H,  $H_{\text{ar.}}$ ), 7.35 -7.43 (m, 2 H,  $H_{\text{ar.}}$ ) –  $^{13}\text{C NMR}$  (100 MHz,  $\text{CDCl}_3$ ):  $\delta$  = 14.2 (+,  $\text{CH}_3$  Hex.), 21.5 (+,  $\text{CH}_3$  Thiox.), 22.8 (-,  $\text{CH}_2$ , Hex.), 29.7 (-,  $\text{CH}_2$ , Hex.), 31.9 (-,  $\text{CH}_2$ , Hex.), 32.3 (-,  $\text{CH}_2$ , Hex.), 34.7 (-,  $\text{CH}_2$ , Hex.), 56.5 (+,  $\text{CH}_3$ ,  $\text{OCH}_3$ ), 111.2 (+, CH, 5- $\text{CH}_{\text{TX}}$ ), 124.2 (+, CH, 2- $\text{CH}_{\text{TX}}$ ), 126.2 ( $\text{C}_q$ ,  $\text{C}_{\text{TX}}$ ), 129.0 (+, CH, 7- $\text{CH}_{\text{TX}}$ ), 129.1 (+, CH, 3- $\text{CH}_{\text{TX}}$ ), 130.5 (+, CH, 3- $\text{CH}_{\text{TX}}$ ), 131.1 ( $\text{C}_q$ ,  $\text{C}_{\text{TX}}$ ), 132.2 ( $\text{C}_q$ ,  $\text{C}_{\text{TX}}$ ), 132.3 ( $\text{C}_q$ ,  $\text{C}_{\text{TX}}$ ), 136.9 ( $\text{C}_q$ ,  $\text{C}_{\text{TX}}$ ), 145.9 ( $\text{C}_q$ ,  $\text{C}_{\text{TX}}$ ), 152.2 ( $\text{C}_q$ ,  $\text{C}_{\text{TX}}$ ), 187.3 ( $\text{C}_q$ ,  $\text{CO}_{\text{TX}}$ ) ppm. – MS (70 eV, EI),  $m/z$  (%): 340 (100) [ $\text{M}^+$ ], 283 (75) [ $\text{C}_{17}\text{H}_{15}\text{O}_2\text{S}^+$ ]. – HRMS ( $\text{C}_{21}\text{H}_{24}\text{O}_2\text{S}$ ): calcd. 340.1492; found 340.1493 – IR (ATR):  $\tilde{\nu}$  ( $\text{cm}^{-1}$ ) = 2923 (w), 2853 (w), 1642 (m), 1573 (w), 1560 (w), 1433 (m), 1380 (vw), 1286 (w), 1257 (m), 1215 (m), 1064 (m), 958 (w), 858 (w), 801 (w), 780 (w), 725 (w), 692 (w), 570 (vw), 437 (vw). – EA: calcd. for  $\text{C}_{21}\text{H}_{24}\text{O}_2\text{S}$ : C 74.08, H 7.11, S 9.42; found C 74.65, H 7.27, S 9.44

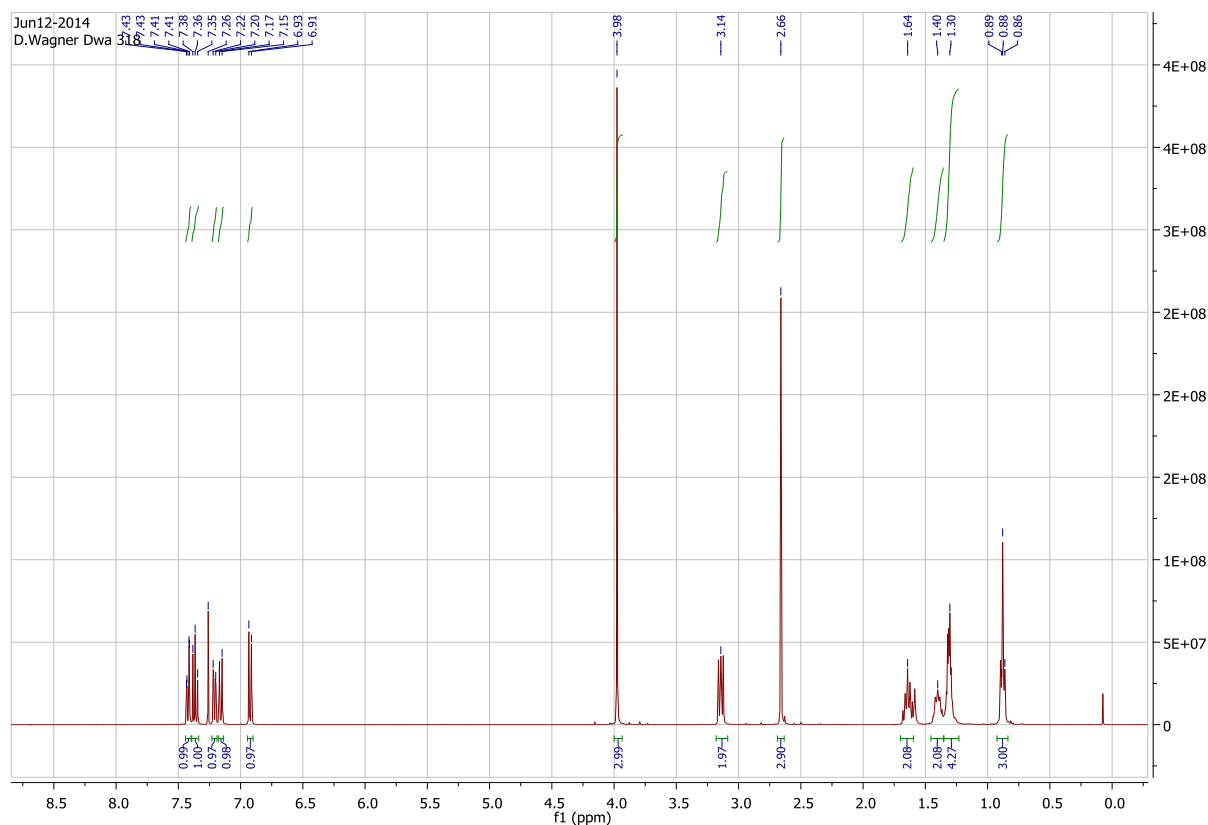



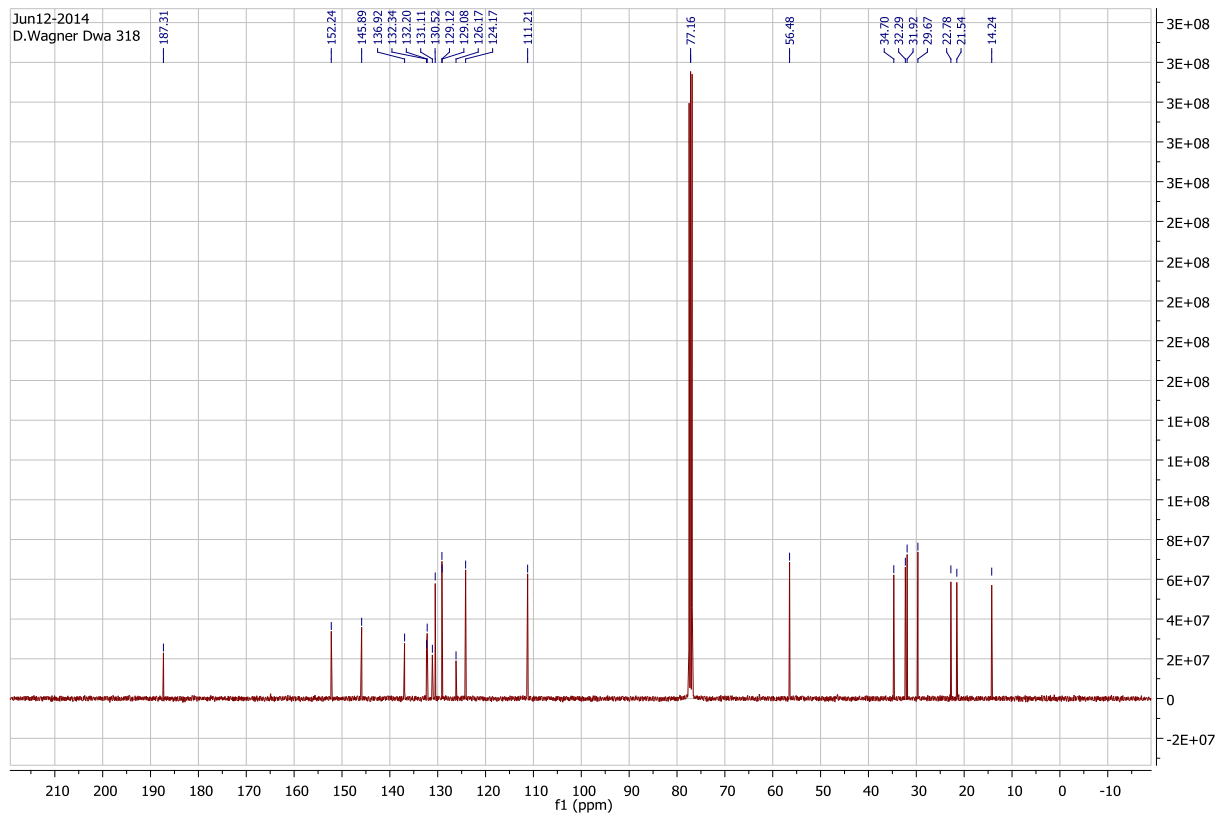

Supplement: Additional file 1 [file 1860-5397-11-49-S1.pdf]
